# Supplementary material
Source: PubMed Central journal article supplement (PMC4054323)
Supplement: MCB.00147-14_zmb999100486so1.pdf [file MCB.00147-14_zmb999100486so1.pdf]

**Fig. S1.** Pim kinase inhibitor reduces cell surface MET expression. PC3-LN4, H1993, or BT474 cells were treated with AZD1208 (3  $\mu$ M) for 24 hours. Levels of cell surface MET were visualized by flow cytometry using anti-MET antibody and PE-conjugated secondary antibody.

**Fig. S2.** Wound-healing/scratch assay. Mouse prostate epithelial cells with (WFU12) and without (WFU8) Pim-1 expression were treated with HGF (100 ng/ml) for 24 h. SMI-4a (10  $\mu$ M) or PHA665752 (1  $\mu$ M) were added. The moving fronts are indicated.

**Fig. S3.** eIF4B regulates MET expression. (A) Predicted secondary structure of the MET 5'UTR as determined using the MFOLD algorithm (<http://mfold.rna.albany.edu/>). The overall folding energy ( $\Delta$ G) of the most stable structure = -239.30 kcal/mol. (B) HeLa cells were treated with eIF4B siRNA (siIF4B) or a control siRNA (siC) for 72 h. Cell lysates were analyzed by immunoblot assays using indicated antibodies. (C) HeLa and U2OS cells were transfected with pR-MET-F construct together with a nontargeting control (siC), or eIF4B (siIF4B), or eIF4A (siIF4A) siRNA. Ratios of firefly/*Renilla* luciferase activities are shown. The average  $\pm$ S.D. of four independent experiments with duplicates in each experiment are shown.  $p < 0.05$ , siC Vs siIF4B.

**Fig. S4.** Pim-1 phosphorylates eIF4B at S406. (A) Tandem mass spectra of HPSWRSEETQER, the trypsin cleavage fragment 404-415 of eIF4B (upper panel), and SRTGSESSQTGTSTTSSR, the trypsin cleavage fragment 418-435 of human eIF4B (lower panel). The amino acid sequence was determined via a Sequest HT search with phosphorylation confirmed at S406 (**s**). The site of phosphorylation was identified with 89% localization probability using the PhosphoRS 3.0 algorithm and confirmed by a

manual review of the data. PC3-LN4 (B) and BT474 (C) cells were treated with Pim-1 siRNA for 72 h. Cell lysates were analyzed by immunoblot assays using the indicated antibodies. PC3-LN4 (D) and BT474 (E) cells were treated with Pim-1 siRNA for 48 h, then cells were serum-starved for 24 h before stimulated with insulin (1  $\mu\text{g}/\text{ml}$ ) or 20% FBS for additional 30 min. Cell lysates were analyzed by immunoblot assays using indicated antibodies.

**Fig. S5.** Phosphorylation of eIF4B S406 and S422 are controlled by Pim and PI3K/AKT/mTOR pathways, respectively. PC3-LN4 (A) and BT474 (B) cells were treated with various inhibitors for 3 h: MK2206 (MK, 1  $\mu\text{M}$ ), Rapamycin (Rapa or Ra, 100 nM), PP242 (1  $\mu\text{M}$ ), BEZ235 (0.5  $\mu\text{M}$ ), UO126 (UO, 15  $\mu\text{M}$ ), BI-D1870 (BI, 10  $\mu\text{M}$ ), GNE-652 (1  $\mu\text{M}$ ), AZD1208 (3  $\mu\text{M}$ ). Cell lysates were analyzed by immunoblot assays using the indicated antibodies. PC3-LN4 (C) and BT474 (D) cells were serum-starved for 24 h and pretreated with inhibitors as in (A) and (B) before stimulating with insulin (1  $\mu\text{g}/\text{ml}$ ) for 30 min. Cell lysates were analyzed by immunoblot assays using the indicated antibodies.

**Fig. S6.** eIF4B S406 phosphorylation is important for MET translation. (A) PC3-LN4 or BT474 cells were treated with AZD1208 (3  $\mu\text{M}$ ), BEZ235 (0.5  $\mu\text{M}$ ), cycloheximide (CHX, 100  $\mu\text{g}/\text{ml}$ ) for 3 h prior to labeling new protein synthesis with  $^{35}\text{S}$ . Newly synthesized MET and ERK were immunoprecipitated and separated by SDS-PAGE, and visualized by autoradiography. (B) U2OS cells were transfected with pR-MET-F construct together with eIF4B or its mutants. After 24 h luciferase assays were performed. Relative ratios of firefly/*Renilla* luciferase activities are shown. The ratio for the vector control was set

as 1. The average  $\pm$ S.D. of these measurements are shown.  $p < 0.05$ , WT Vs Vector;  $p < 0.02$ , WT Vs S406A or S406/422A.

**Fig. S7.** Pim-1 regulates the protein translation of INSR and c-Myc through the phosphorylation of eIF4B S406. (A) Cell lysates from U2OS and PC3-LN4 cells treated with Pim-1 siRNA or MEFs (WT and TKO) were analyzed by immunoblot assays using the indicated antibodies. (B) Real-time PCR assays were carried out using total RNA extracted from PC3-LN4 cells treated with Pim-1 or MEFs (WT and TKO). (C) Polysome profiling assays were performed in MEFs (WT and TKO). 18 fractions (0.6 ml/fraction) were collected. RNA gels were shown (middle panel). Semi-quantitative RT-PCR assays were carried out using pooled fractions as indicated. (D) U2OS cells were transfected with a control vector, or plasmids expressing wild-type eIF4B (WT) and its mutants for 48 h. Cell lysates were analyzed by immunoblot assays using indicated antibodies.

**Table S1.** Phase I clinical trial of AZD1208 patient dosing and sample collecting information.

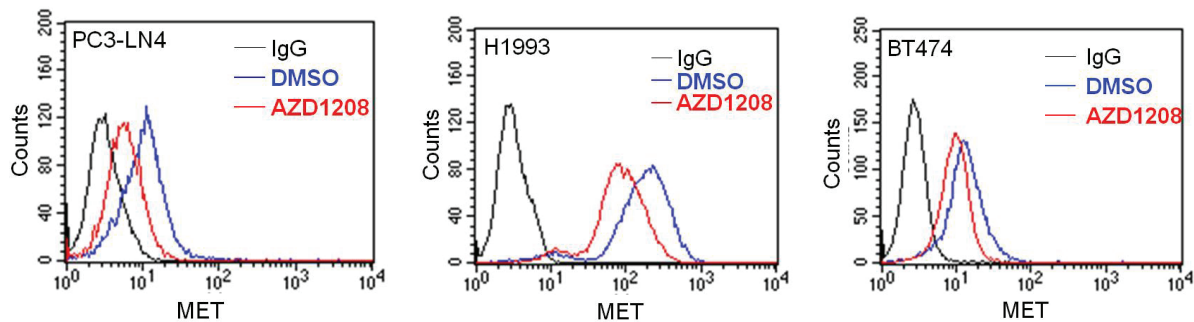

Fig. S1

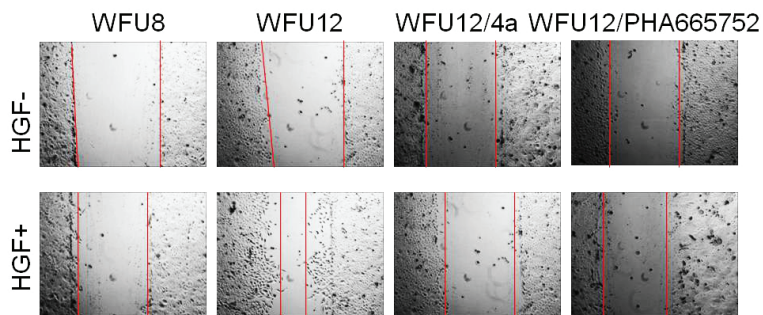

Fig. S2

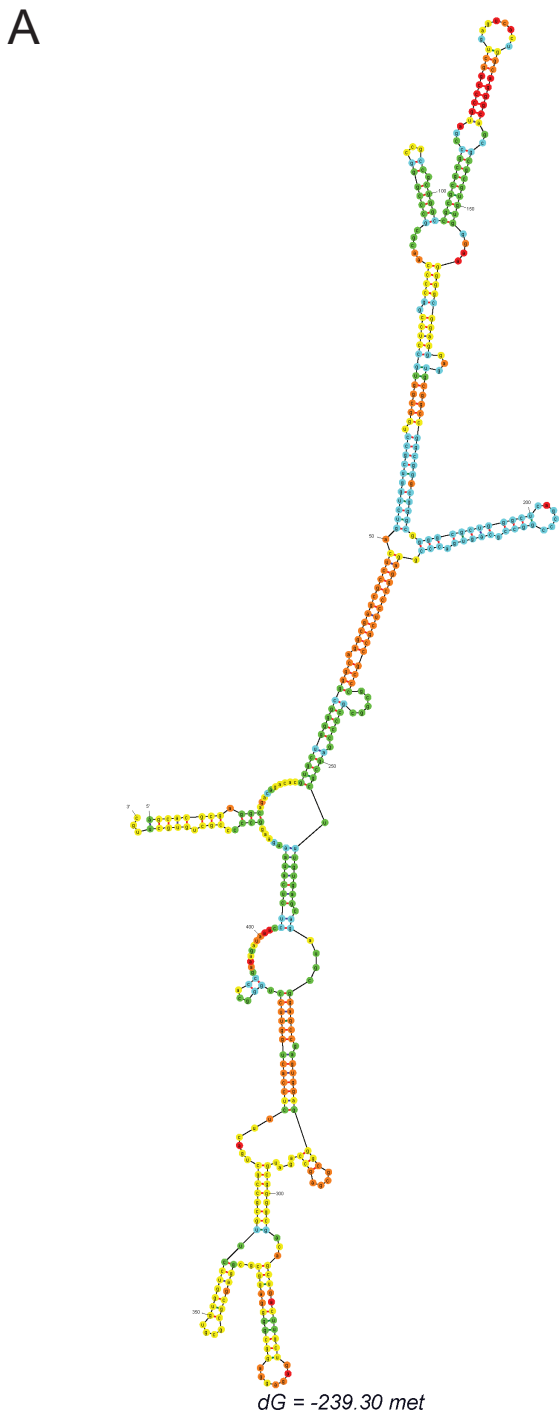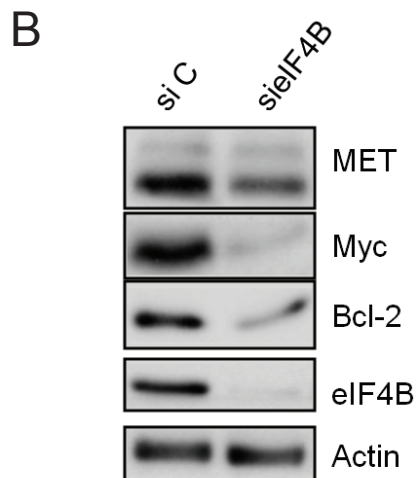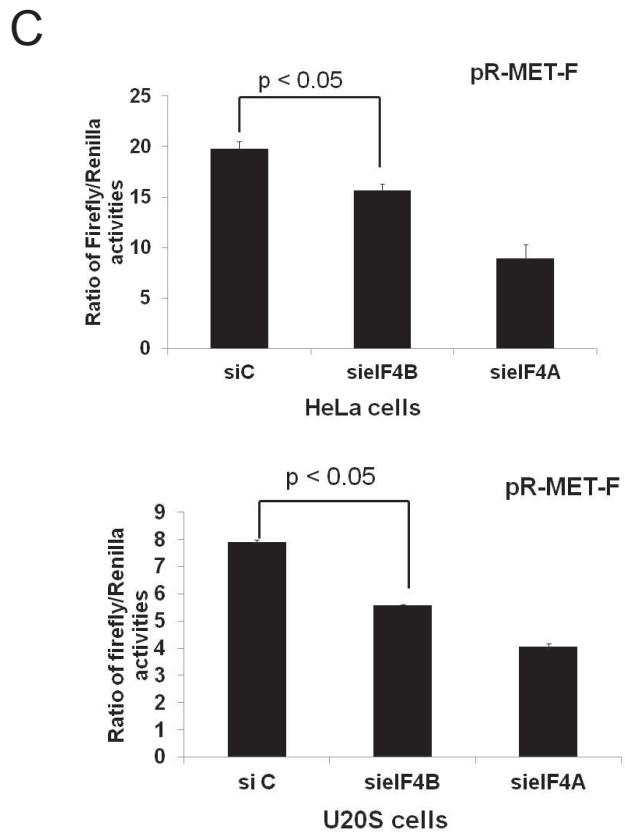

Fig. S3

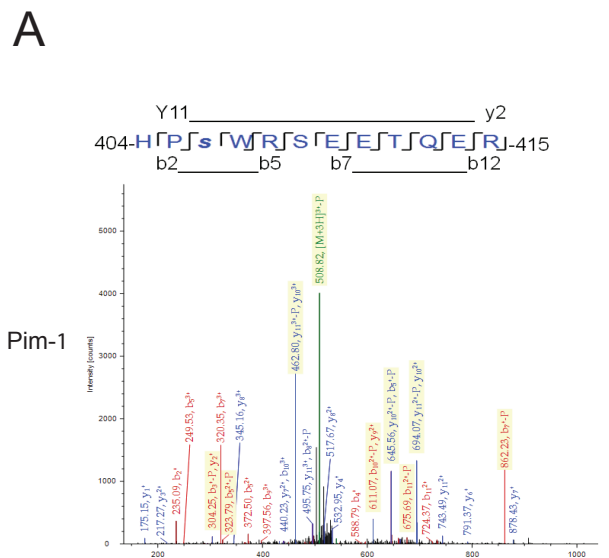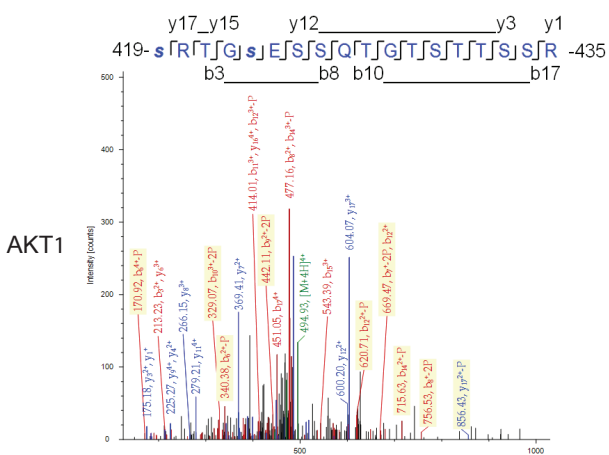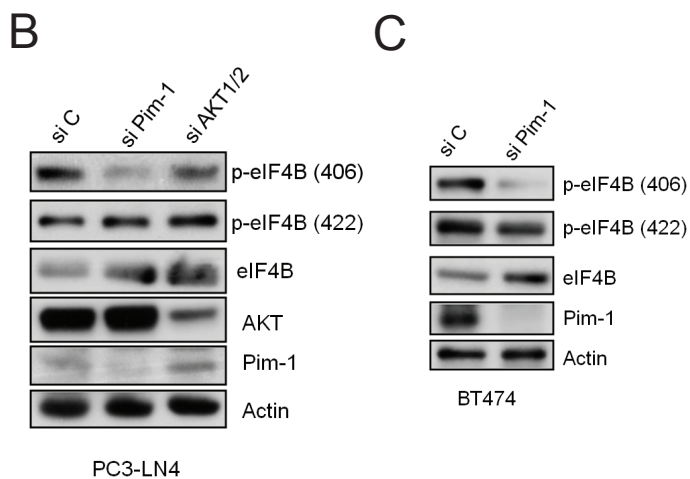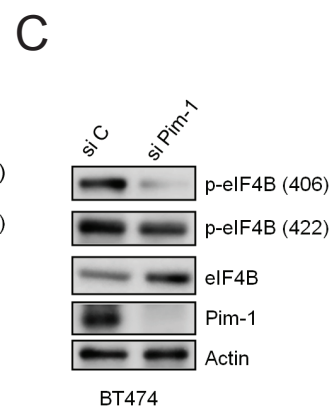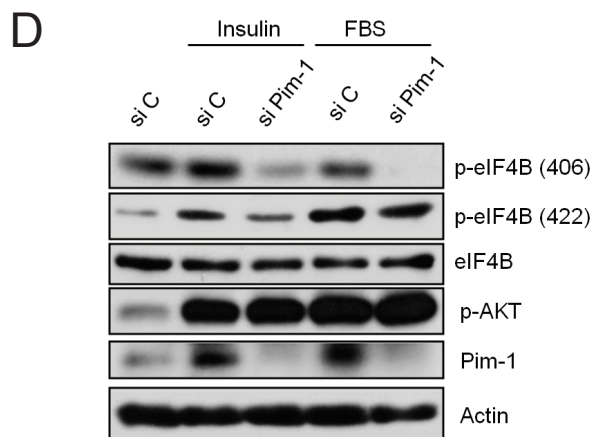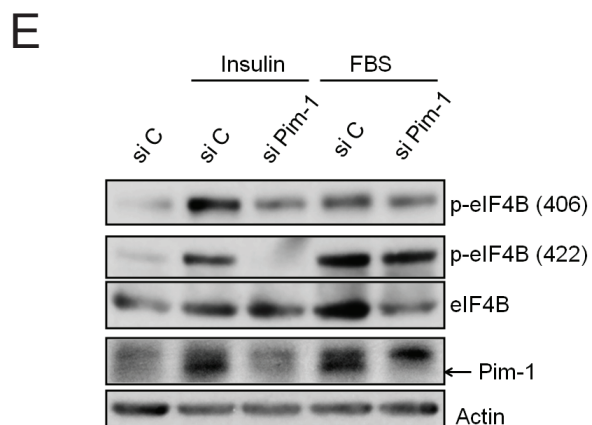

Fig. S4

**A**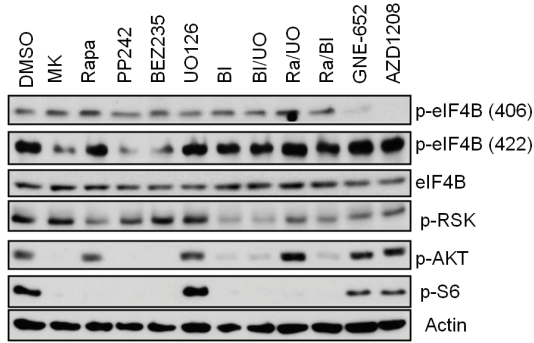**B**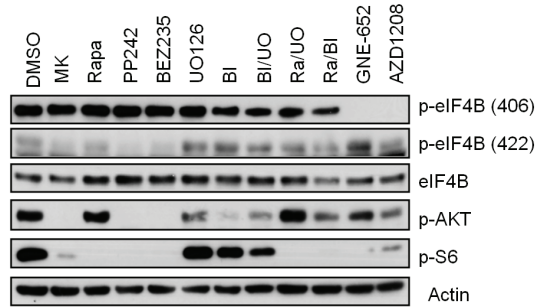**C**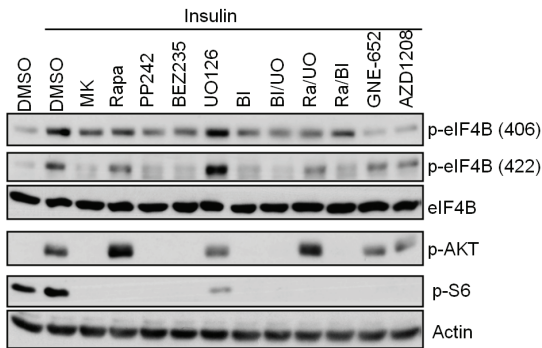**D**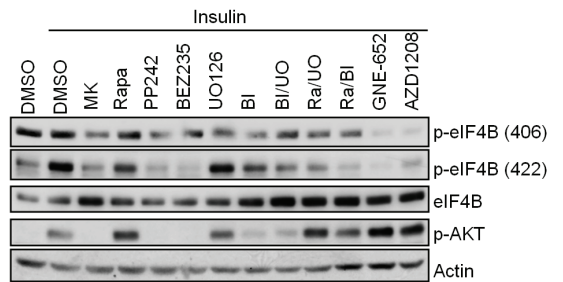

**A**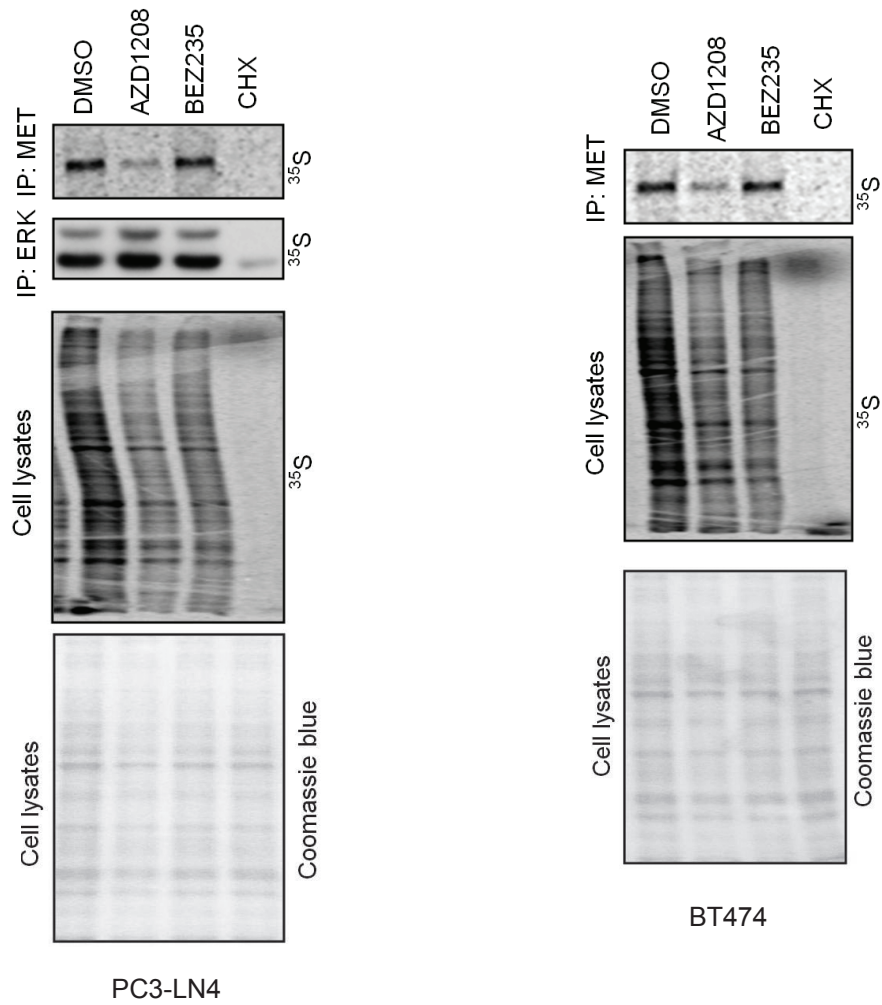**B**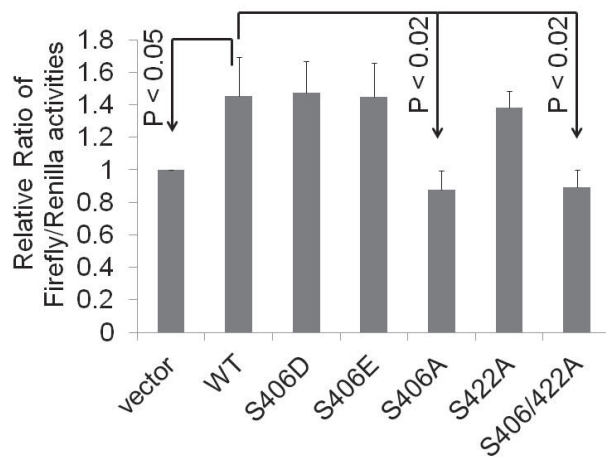

Fig. S6



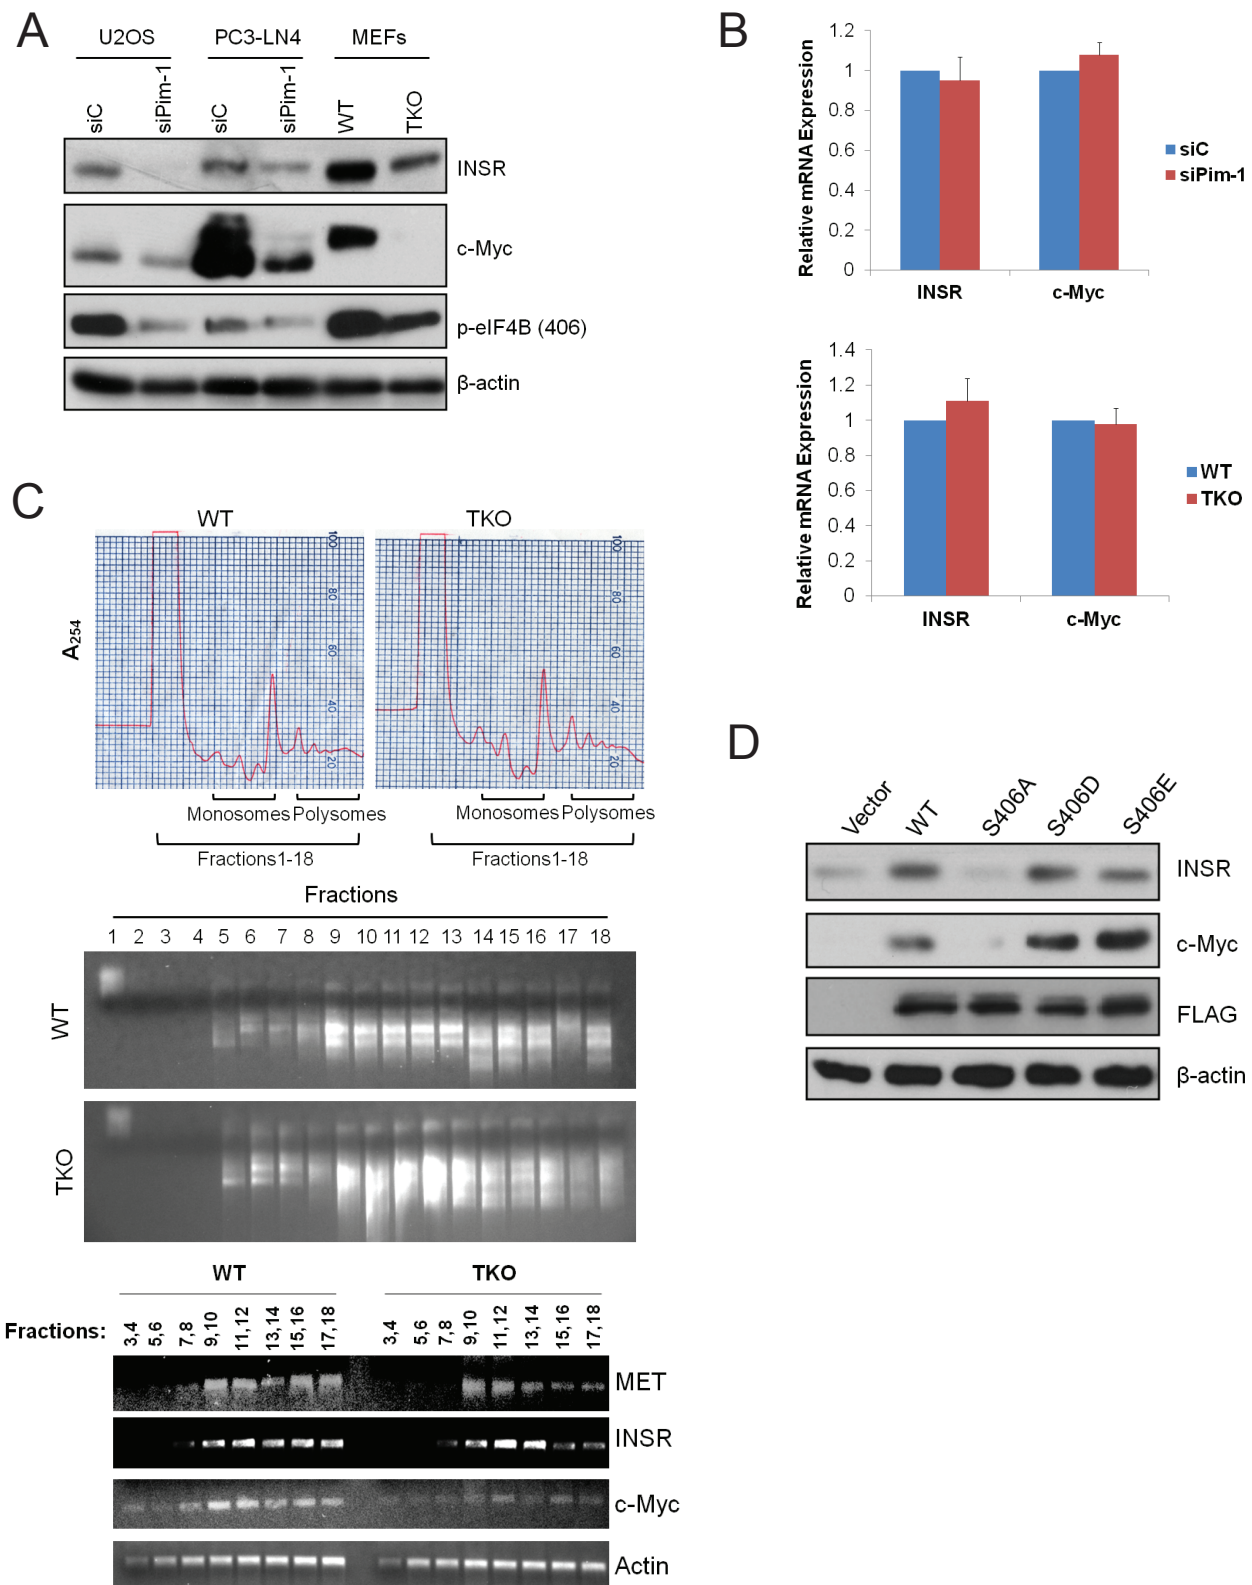

Fig. S7

**Phase I Clinical Trial of AZD1208 (NCT01489722)**  
**Patient Information**

| <b>Patient</b> | <b>Drug Dose (mg)</b> | <b>Sample Blast Count</b> |                         |
|----------------|-----------------------|---------------------------|-------------------------|
|                |                       | <b>Bone Marrow</b>        | <b>Peripheral Blood</b> |
| 1009           | 480                   | unknown                   | unknown                 |
| 2003           | 240                   | 89% blasts                | 17 x 10 <sup>9</sup> /L |
| 2012           | 900                   | unknown                   | 8 x 10 <sup>9</sup> /L  |
| 2013           | 900                   | 41% blasts                | 17 x 10 <sup>9</sup> /L |
| 2016           | 700                   | 75% blasts                | <1 x 10 <sup>9</sup> /L |
| 3002           | 240                   | 80% blasts                | 22 x 10 <sup>9</sup> /L |
| 3010           | 700                   | unknown                   | unknown                 |
